# Supplementary material for: Withaferin A Enhances Mitochondrial Biogenesis and BNIP3-Mediated Mitophagy to Promote Rapid Adaptation to Extreme Hypoxia
Source: MDPI journal article supplement (doi:10.3390/cells12010085), 2022-12-25
Supplement: s1 [file s1]

## **Supplemental material**

### **Withaferin A enhances mitochondrial biogenesis and BNIP3-mediated mitophagy to promote rapid adaptation to extreme hypoxia**

**Ruzhou Zhao<sup>1,2\*</sup>, Yixin Xu<sup>3\*</sup>, Xiaobo Wang<sup>1</sup>, Xiang Zhou<sup>1</sup>, Yanqi Liu<sup>1</sup>, Shuai Jiang<sup>1</sup>, Lin Zhang<sup>1</sup>, Zhibin Yu<sup>1</sup>**

**Supplemental Figures S1-S3**

**Supplemental Table S1-S4**

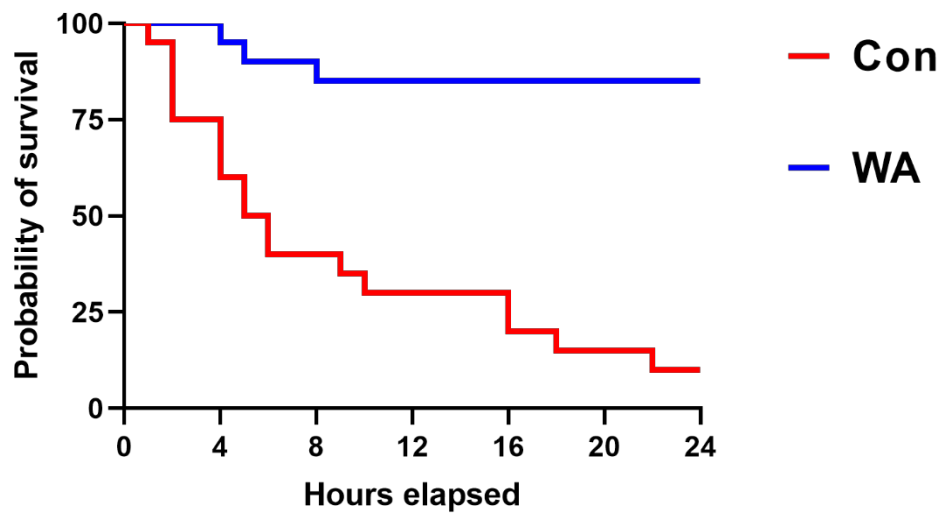

Figure S1. Twenty-four hours under 7620 m survival curves for SD rats with and without treatment with WA.

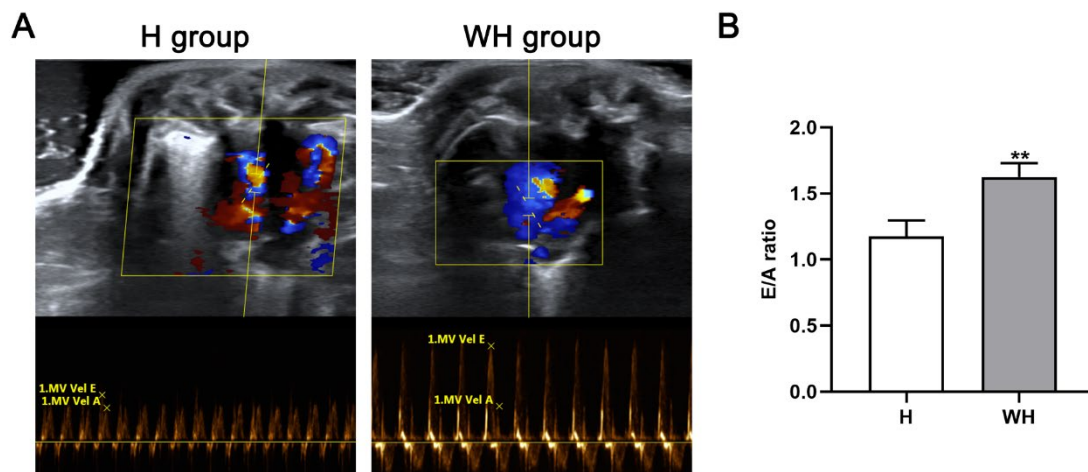

Figure S2. WA improved the diastolic function of hearts in rats under extreme hypoxia. (A)

Representative images of pulse-wave Doppler. (B) Quantified results of E/A ratio. \*\* $p < 0.01$

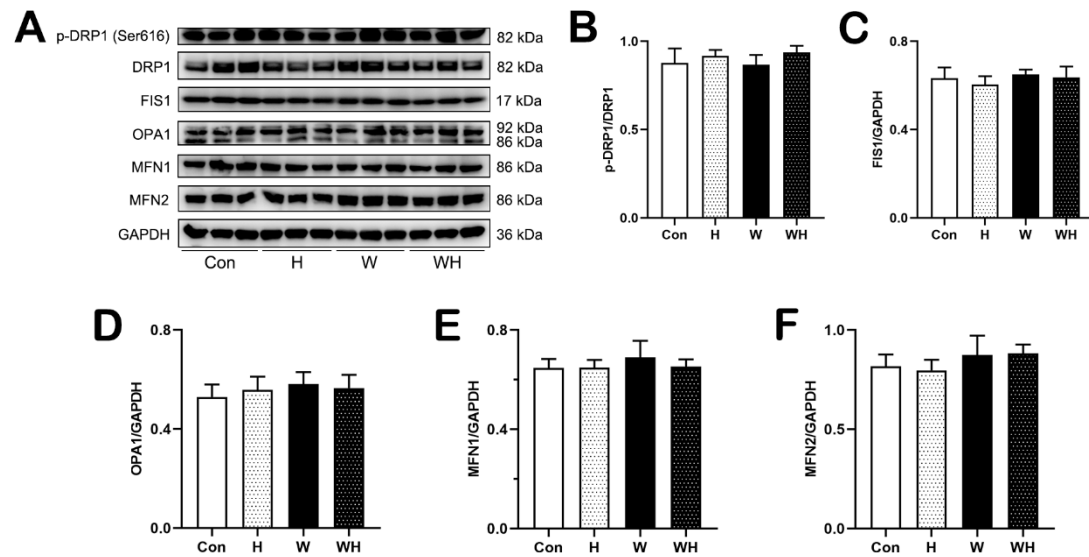

**Figure S3. Effect of WA on the expression of mitochondrial fusion and fission proteins in myocardium of rats.** (A) Representative immunoblots of indicated proteins. (B-F) Statistical graphs of the protein levels of p-DRP1 (B), FIS1 (C), OPA1 (D), MFN1 (E), and MFN2 (F).

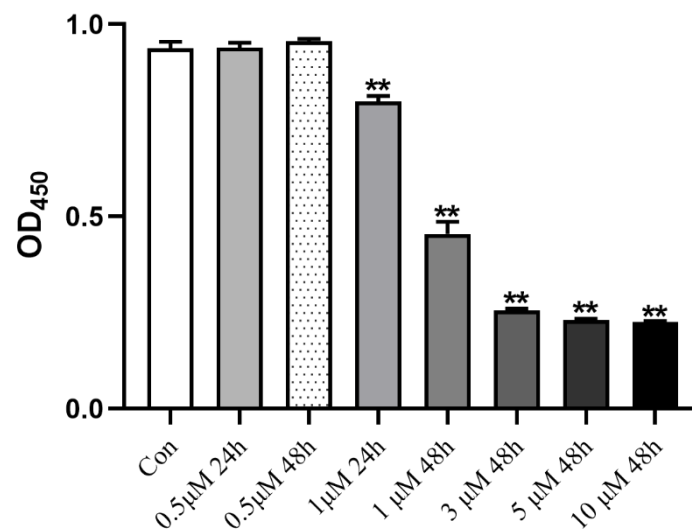

**Figure S4. The effect of WA on the cardiomyocyte's viability used with different concentration and action time.** \*\* $p < 0.01$ .

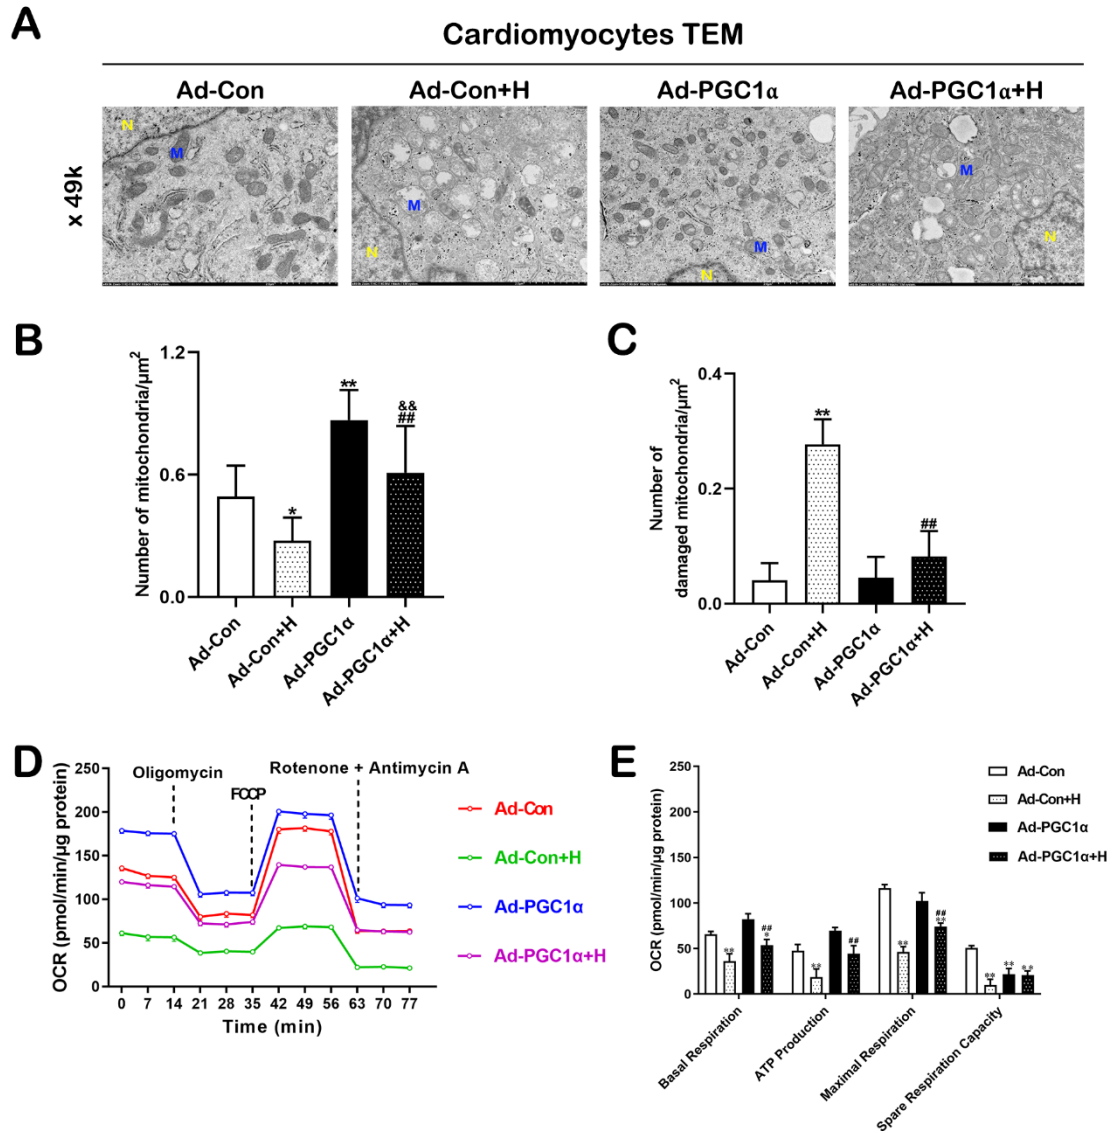

**Figure S5. Overexpression of PGC-1α increased mitochondrial number and improved mitochondrial respiratory function of cardiomyocytes during acute hypoxia. (A)**

Representative electron micrograph of cardiomyocytes. M, mitochondria. N, nucleus. Scale bars = 2 μm. (B-C) Number of mitochondria or damaged mitochondria per μm². (D-E) OCR curves and quantification of related indices. n = 5. \*\* $p < 0.01$  or \* $p < 0.05$  vs. the Ad-Con group. ## $p < 0.01$  vs. the Ad-Con+H group. &#p < 0.01 vs. the Ad-PGC1α+H group.

**Table S1. Survival rates of adult SD rats (10 ~ 12 weeks old) after exposure to 7620 m for 24****h**

|     | T  | S  | R (%) |
|-----|----|----|-------|
| Con | 21 | 2  | 9.5   |
| WA  | 21 | 18 | 85.7  |

Con, normal SD rats; WA, SD rats i.p. with 2mg/kg/d for 7d; T, total number of SD rats in experiments; S, survival number of SD rats after exposure to 7620 m for 24 h; R, survival rate of SD rats after exposure to 7620 m for 24 h.

**Table S2. Details of primary antibodies**

| Antibody       | Manufacturer and Cat No.         | Application | Dilute proportion |
|----------------|----------------------------------|-------------|-------------------|
| p-DRP1         | Cell Signaling Technology, #3455 | WB          | 1:1000            |
| DRP1           | Cell Signaling Technology, #8570 | WB          | 1:1000            |
| FIS1           | Proteintech, #10956-1-AP         | WB          | 1:1000            |
| OPA1           | Abcam, #ab42364                  | WB          | 1:1000            |
| MFN1           | Proteintech, #13798-1-AP         | WB          | 1:1000            |
| MFN2           | Proteintech, #12186-1-AP         | WB          | 1:2000            |
| PGC-1 $\alpha$ | Proteintech, #66369-1-Ig         | WB          | 1:5000            |
| NRF2           | Abcam, #ab89443                  | WB          | 1:1000            |
| NRF1           | Proteintech, #12482-1-AP         | WB          | 1:1000            |
| TFAM           | Proteintech, #22586-1-AP         | WB          | 1:2000            |
| Beclin1        | Proteintech, #11306-1-AP         | WB          | 1:1000            |
| P62            | Proteintech, #18420-1-AP         | WB          | 1:1000            |
| LC3            | Abcam, #ab48394                  | WB          | 1:1000            |
| BNIP3          | Abcam, #ab109362                 | WB          | 1:1000            |

|       |                          |    |        |
|-------|--------------------------|----|--------|
| GAPDH | Proteintech, #60004-1-Ig | WB | 1:5000 |
|-------|--------------------------|----|--------|

**Table S3. Details of second antibodies**

| Antibody                               | Manufacturer and Cat No.            | Application | Dilute proportion |
|----------------------------------------|-------------------------------------|-------------|-------------------|
| Anti-rabbit,<br>HRP-linked<br>antibody | Cell Signaling Technology,<br>#7074 | WB          | 1:5000            |
| Anti-mouse,<br>HRP-linked<br>antibody  | Cell Signaling Technology,<br>#7076 | WB          | 1:5000            |

**Table S4. Details of mRNA primers (R, rat; H, human)**

| Genes/Origin             |   | Forward primer              | Reverse primer              |
|--------------------------|---|-----------------------------|-----------------------------|
| $\beta$ -actin<br>(mRNA) | R | CCCATCTATGAGGGTTACGC        | TTTAATGTCACGCACGATTTC       |
|                          | H | GCACTCTTCCAGCCTTCCTTCC      | GCGGATGTCCACGTCACACTTC      |
| PGC-1 $\alpha$           | R | CCACTACAGACACCGCACACATC     | GTATTCGTCCCTCTTGAGCCTTTTCG  |
|                          | H | TCCAGGTCAAGATCAAGGTCTCCAG   | GTGCGGTGTCTGTAGTGGCTTG      |
| NRF2                     | R | GACAAACATTCAAGCCGATTAG      | TTATTCTTCCCTCTCCTGCG        |
|                          | H | AGTCCAGAAGCCAAACTGACAGAAG   | GGAGAGGATGCTGCTGAAGGAATC    |
| NRF1                     | R | TCTGCTGTGGCTGATGGAGAGG      | GATGCTTGCGTCGTCTGGATGG      |
|                          | H | AATTATTCTGCCGTGGCTGATGGAG   | CCTCTGATGCTTGCGTCGTCTG      |
| TFAM                     | R | GTGATCTCATCCGTCGCAGTGTG     | TGCCCAATCCCAATGACAACTCTG    |
|                          | H | TGGCGTTTCTCCGAAGCATGTG      | TGCCAAGACAGATGAAAACCACCTC   |
| BNIP3                    | R | TCTTCTTGCTTGCAGGATGAGGATTTC | AGCAGAGAGATAAAGGCGTAACACAAC |
|                          | H | AGCATGAGTCTGGACGGAGTAGC     | TCTGTTGGTATCTTGTGGTGTCTGC   |
| $\beta$ -actin<br>(DNA)  | R | TCGTGCGTGACATTAAAGAG        | ATTGCCGATAGTGATGACCT        |
|                          | H | TCGTGCGTGACATTAAGGAGAAGC    | TGAGAGGGAAATGAGGGCAGGAC     |
| ND-1                     | R | AAGCGGCTCCTTCTCCCTACAAAT    | GAAGGGAGCTCGATTTGTTTCTGC    |
|                          | H | TCAAACCTCAAACCTACGCCCTGATCG | GTTCGGTTGGTCTCTGCTAGTGTG    |
